# Supplementary material for: Prescription for antibiotics at drug shops and strategies to improve quality of care and patient safety: a cross-sectional survey in the private sector in Uganda
Source: PubMed Central journal article supplement — BMJ Open. 2016 Mar 15;6(3):e010632. doi: 10.1136/bmjopen-2015-010632 (PMC4800164; doi:10.1136/bmjopen-2015-010632), 2016-03-15
Supplement: bmjopen-2015-010632supp.pdf [file bmjopen-2015-010632supp.pdf]

## **BASELINE SURVEY OF THE PRIVATE CLINICS AND DRUG SHOPS.**

**Title of the study:** Prescription of antibiotics at drug shops and strategies to improve quality of care and patient safety: a cross-sectional survey in the private sector in Uganda.

**Study Investigators:** Prof. Anthony Mbonye, Prof. Elizeus Rutebemberwa, and Dr. Esther Buregyeya

### **Drug Shop/Private clinic Consent Form**

#### **Introduction**

This research study is being conducted by Makerere University School of Public Health. You are being asked to take part in a study “Assessing the effect of strengthening referral of sick children from the private health sector and its impact on referral uptake in Uganda.”

This study aims to test a community-based intervention to encourage uptake of referral. We are asking you for your consent to be interviewed as part of this study because you are a service provider in this community. Your selection has been random, but your participation in this study is voluntary.

#### **Purpose of the Research**

This study aims to improve referral of sick children from the private sector to higher facilities. We are carrying out a baseline study, where we will collect information regarding address/location, staffing, drug stocks and services provided by your clinic/drug shop. In addition, we are seeking for your consent in the follow up study, i.e a randomized controlled trial (RCT). This study is intended to provide information that will help to improve referral of sick children from the private sector across the country.

#### **Your Part in the Study**

If you agree to participate in the study you will be interviewed for about 30 minutes, and if you consent to participate in the follow up study, you will be trained in the standard management of malaria, pneumonia and diarrhoea – integrated community management of fever after that be given appointments for follow-up interviews.

#### **Procedures**

You will be interviewed to obtain basic information, including address, services offered, qualifications and number of health providers, drug availability and services offered by your clinic/ drug shops. We will also seek your consent to participate in a follow on study where we will test a community-based intervention to encourage uptake of referral. All of the information you share will be confidential and the information you provide will only be available to the research team.

#### **If You Decide not to Participate in the Study**

Your participation in the study is voluntary and there is no penalty for refusing to take part. There will be no cost to you as a result of participating in this study.

#### **Confidentiality**

The information you provide will be confidential. We will not put your name or the name of the clinic/drug shop on the questionnaire form on which your responses will be recorded. Paper records from this study will be stored in a locked file cabinet accessible only to study staff. Computerized information about you will be password-protected and accessible only to study investigators. If we publish the results of the study the name of the clinic/drug shop will not be in it.

#### **Benefits**

There will be no personal benefits from participating in this baseline study. However, if you consent to participating on the follow on study, you will be trained in ICCM. In addition, this study will help us understand how to strengthen referral of sick children from private sectors to higher facilities in Uganda.

#### **Risks or Discomfort**

You may lose some of your clients after referring them, however it will be to their benefit in getting proper care. But once the caretakers are made to understand the reason for the referral, they will appreciate it and will still come to your facility for care. You may refuse to answer questions that make you feel uncomfortable, and you may choose to end the interview and your participation in the study at any time. The information you provide will be kept confidential.

**Contact Person for Questions**

If you have any questions about the study or any problems with the study you may contact Assoc. Prof. Anthony Mbonye, the PI at the following telephone number (0772-411668). If you have any questions about your rights as a participant in this study please contact Dr. Suzanne Kiwanuka, the Chairperson of the School of Public Health Ethics Committee, at the telephone number 0312 291 397 or 0718 060 387.

**Consent to Participate in Study**

I have been informed of the procedures, benefits and risks of participating in this study titled: “Assessing the effect of strengthening referral of sick children from the private health sector and its impact on referral uptake in Uganda.

.”I agree to participate as a volunteer in this study.

I agree for my shop to be part of the trial:

**Name of Drug Shop/private clinic:** \_\_\_\_\_

Type of facility: 1. Drug shop 2. Private clinic

**Name of Trading Centre/Village:** \_\_\_\_\_

**Identity of Enumeration Area:** \_\_\_\_\_ **Sub-County:** \_\_\_\_\_

**Name of Drug Shop Owner:** \_\_\_\_\_

**Signature:** \_\_\_\_\_ **Date:** \_\_\_\_\_

I have discussed the study with the drug shop owner/private clinic named above, in a language he/she can comprehend. I believe he/she has understood my explanation and agrees to take part in the trial.

**Name:** \_\_\_\_\_

**Signature:** \_\_\_\_\_ **Date:** \_\_\_\_\_

|                                                                                                                                                                                                                                  |                                                            |
|----------------------------------------------------------------------------------------------------------------------------------------------------------------------------------------------------------------------------------|------------------------------------------------------------|
| <p>Q1. Do you consent that the drug shop/private clinic will participate in the study?<br/>         0 No<br/>         1 Yes</p>                                                                                                  | <p>[__]</p>                                                |
| <p>Q2. If refused consent what was the reason?<br/>         1 Too busy<br/>         2 Too ill<br/>         3 Not interested<br/>         4 Refuses to give reason<br/>         77 Other (specify)<br/>         88 Don't know</p> | <p>[__ __]<br/>         If other:<br/>         [_____]</p> |

| <b>Section A: Background Information</b>                          |                                                                                                                                                  |                                                             |
|-------------------------------------------------------------------|--------------------------------------------------------------------------------------------------------------------------------------------------|-------------------------------------------------------------|
| A1                                                                | Date of interview (dd/mm/yy)                                                                                                                     | [ ][ ]/[ ][ ]/[ ][ ]                                        |
| A2                                                                | Name of interviewer<br>[ ]                                                                                                                       | Interviewer's code<br>[ ][ ]                                |
| A3                                                                | Enumeration area code                                                                                                                            | [ ][ ]                                                      |
| A4                                                                | District                                                                                                                                         | [ ]                                                         |
| A5                                                                | Locality<br>1 Urban<br>2 Rural                                                                                                                   | [ ]                                                         |
| A6                                                                | Village<br>[ ]                                                                                                                                   | Village code<br>[ ][ ]                                      |
| A7                                                                | Parish<br>[ ]                                                                                                                                    | Parish code<br>[ ][ ]                                       |
| A8                                                                | Sub-county<br>[ ]                                                                                                                                | Sub-county code<br>[ ][ ]                                   |
| A9                                                                | Name of drug shop/private clinic<br>[ ]                                                                                                          | Drug shop/private clinic code<br>[ ][ ]                     |
| A10                                                               | Type of facility 1. Drug shop 2. private clinic                                                                                                  | [ ]                                                         |
| A11                                                               | GPS coordinates (xxxx)                                                                                                                           | [ ][ ] . [ ][ ][ ][ ] [ ][ ]                                |
| <b>Section B: Characteristics of the drug shop/private clinic</b> |                                                                                                                                                  |                                                             |
| B1                                                                | Is this drug shop/private clinic registered?<br>0 No go to B2<br>1 Yes go to B3<br>99 Refuses to answer go to B4                                 | [ ][ ]                                                      |
| B2                                                                | If not registered, why not? go to B5                                                                                                             | [ ]                                                         |
| B3                                                                | Who are you registered with?<br>1 District (DDI) (receipt seen)<br>2 National Drug Authority (NDA)<br>(certificate seen)<br>99 Refuses to answer | [ ][ ]                                                      |
| B4                                                                | When was this drug shop/private clinic established? (Year/months)                                                                                | [ ][ ] / [ ][ ][ ][ ] Year<br>months                        |
| B5                                                                | Which days of the week is this drug shop/private clinic open? (please tick all day mentioned)                                                    | Mon Tue Wed Thur Fri Sat Sun<br>[ ] [ ] [ ] [ ] [ ] [ ] [ ] |
| B6                                                                | What time do you usually open this drug shop/private clinic? (week days)                                                                         | [ ][ ] : [ ][ ] am                                          |
| B7                                                                | What time do you usually close this drug shop/private clinic? (hh/mm)- week days                                                                 | [ ][ ] : [ ][ ] pm                                          |
| B8                                                                | What time do you usually open this drug shop/private clinic? (hh/mm)- weekends                                                                   | [ ][ ] : [ ][ ] pm                                          |
| B9                                                                | What time do you usually close this drug shop/private clinic? (hh/mm)- weekends                                                                  | [ ][ ] : [ ][ ] pm                                          |

|                                                                                      |                                                                                                                                                                                                                                                                |                                              |
|--------------------------------------------------------------------------------------|----------------------------------------------------------------------------------------------------------------------------------------------------------------------------------------------------------------------------------------------------------------|----------------------------------------------|
| B10                                                                                  | <p>What is the busiest time for this drug shop/private clinic?</p> <p>1 Morning (up to 12pm)<br/> 2 Afternoon (12pm-5pm)<br/> 3 Evening (5pm-7pm)<br/> 4 Night (7pm-12am)<br/> 5 Busy 24 hours<br/> 77 Other (specify)</p>                                     | <p>[__ __]</p> <p>If other:<br/> [_____]</p> |
| B11                                                                                  | <p>Do you have a patient register?</p> <p>0 No if No go to B13<br/> 1 Yes</p>                                                                                                                                                                                  | <p>[__]</p>                                  |
| B12                                                                                  | <p>Is the patient register present? (<i>Ask to see it</i>)</p> <p>0 No<br/> 1 Yes</p>                                                                                                                                                                          | <p>[__]</p>                                  |
| B13                                                                                  | <p>On a typical day how many children with fever aged less than 5 years visit this drug shop/private clinic?<br/> (<i>If don't know write 88</i>)</p>                                                                                                          | <p>[__ __]</p>                               |
| B14                                                                                  | <p>On a typical day how many children with cough aged less than 5 years visit this drug shop/private clinic?<br/> (<i>If don't know write 88</i>)</p>                                                                                                          | <p>[__ __]</p>                               |
| B15                                                                                  | <p>On a typical day how many children with diarrhea aged less than 5 years visit this drug shop/private clinic?<br/> (<i>If don't know write 88</i>)</p>                                                                                                       | <p>[__ __]</p>                               |
| <b>Section C: Staff characteristics ( staff who run the drug shop/private clinic</b> |                                                                                                                                                                                                                                                                |                                              |
| C1                                                                                   | <p>Sex</p> <p>1. Male<br/> 2. Female</p>                                                                                                                                                                                                                       | <p>[__]</p>                                  |
| C2                                                                                   | <p>What is your job or profession?</p> <p>1 Nursing Aide<br/> 2 Nursing assistant<br/> 3 Enrolled nurse/midwife<br/> 4 Registered Nurse/midwife<br/> 5 Clinical Officer<br/> 6 Doctor<br/> 77 Other (specify)<br/> 88 Don't know<br/> 99 Refuses to answer</p> | <p>[__ __]</p> <p>If other:<br/> [_____]</p> |
| C3                                                                                   | <p>What is your highest level of education?</p> <p>1 Primary<br/> 2 Secondary<br/> 3 Tertiary (certificate/diploma)<br/> 4 University<br/> 77 Other (specify)</p>                                                                                              | <p>[__ __]</p> <p>If other:<br/> [_____]</p> |

|                                         | 88 Don't know<br>99 Refuses to answer                                                                                                                    |                                                                                                                                                                                                                                                                                                                                                                                                                                                                                                                                                                                                                                                                                                                          |                |        |             |                             |                    |        |                           |        |               |                 |                     |        |                     |        |        |           |        |        |                |        |        |                       |        |        |                 |        |        |
|-----------------------------------------|----------------------------------------------------------------------------------------------------------------------------------------------------------|--------------------------------------------------------------------------------------------------------------------------------------------------------------------------------------------------------------------------------------------------------------------------------------------------------------------------------------------------------------------------------------------------------------------------------------------------------------------------------------------------------------------------------------------------------------------------------------------------------------------------------------------------------------------------------------------------------------------------|----------------|--------|-------------|-----------------------------|--------------------|--------|---------------------------|--------|---------------|-----------------|---------------------|--------|---------------------|--------|--------|-----------|--------|--------|----------------|--------|--------|-----------------------|--------|--------|-----------------|--------|--------|
| C4                                      | Is this your main place of work?<br>0 No<br>1 Yes<br>99 Refuses to answer                                                                                | [ ][ ]<br>If no specify other place of work:<br>[ ]                                                                                                                                                                                                                                                                                                                                                                                                                                                                                                                                                                                                                                                                      |                |        |             |                             |                    |        |                           |        |               |                 |                     |        |                     |        |        |           |        |        |                |        |        |                       |        |        |                 |        |        |
| C5                                      | How many people working at this drug shop/private clinic dispense medicines?                                                                             | [ ][ ]                                                                                                                                                                                                                                                                                                                                                                                                                                                                                                                                                                                                                                                                                                                   |                |        |             |                             |                    |        |                           |        |               |                 |                     |        |                     |        |        |           |        |        |                |        |        |                       |        |        |                 |        |        |
| C6                                      | What is the job or profession of the other person(s) working at this drug shop/private clinic?<br><i>(write the number of staff for each profession)</i> | <table border="0"> <thead> <tr> <th>Profession</th> <th colspan="2">Number</th> </tr> </thead> <tbody> <tr> <td>1. Registered nurse/midwife</td> <td>[ ][ ]</td> <td>[ ][ ]</td> </tr> <tr> <td>2. Enrolled nurse/midwife</td> <td>[ ][ ]</td> <td>[ ][ ]</td> </tr> <tr> <td>3. Nursing Aide</td> <td>[ ][ ]</td> <td>[ ][ ]</td> </tr> <tr> <td>3. Clinical officer</td> <td>[ ][ ]</td> <td>[ ][ ]</td> </tr> <tr> <td>4. Doctor</td> <td>[ ][ ]</td> <td>[ ][ ]</td> </tr> <tr> <td>88. Don't know</td> <td>[ ][ ]</td> <td>[ ][ ]</td> </tr> <tr> <td>99. Refuses to answer</td> <td>[ ][ ]</td> <td>[ ][ ]</td> </tr> <tr> <td>Other (specify)</td> <td>[ ][ ]</td> <td>[ ][ ]</td> </tr> </tbody> </table><br>[ ] | Profession     | Number |             | 1. Registered nurse/midwife | [ ][ ]             | [ ][ ] | 2. Enrolled nurse/midwife | [ ][ ] | [ ][ ]        | 3. Nursing Aide | [ ][ ]              | [ ][ ] | 3. Clinical officer | [ ][ ] | [ ][ ] | 4. Doctor | [ ][ ] | [ ][ ] | 88. Don't know | [ ][ ] | [ ][ ] | 99. Refuses to answer | [ ][ ] | [ ][ ] | Other (specify) | [ ][ ] | [ ][ ] |
| Profession                              | Number                                                                                                                                                   |                                                                                                                                                                                                                                                                                                                                                                                                                                                                                                                                                                                                                                                                                                                          |                |        |             |                             |                    |        |                           |        |               |                 |                     |        |                     |        |        |           |        |        |                |        |        |                       |        |        |                 |        |        |
| 1. Registered nurse/midwife             | [ ][ ]                                                                                                                                                   | [ ][ ]                                                                                                                                                                                                                                                                                                                                                                                                                                                                                                                                                                                                                                                                                                                   |                |        |             |                             |                    |        |                           |        |               |                 |                     |        |                     |        |        |           |        |        |                |        |        |                       |        |        |                 |        |        |
| 2. Enrolled nurse/midwife               | [ ][ ]                                                                                                                                                   | [ ][ ]                                                                                                                                                                                                                                                                                                                                                                                                                                                                                                                                                                                                                                                                                                                   |                |        |             |                             |                    |        |                           |        |               |                 |                     |        |                     |        |        |           |        |        |                |        |        |                       |        |        |                 |        |        |
| 3. Nursing Aide                         | [ ][ ]                                                                                                                                                   | [ ][ ]                                                                                                                                                                                                                                                                                                                                                                                                                                                                                                                                                                                                                                                                                                                   |                |        |             |                             |                    |        |                           |        |               |                 |                     |        |                     |        |        |           |        |        |                |        |        |                       |        |        |                 |        |        |
| 3. Clinical officer                     | [ ][ ]                                                                                                                                                   | [ ][ ]                                                                                                                                                                                                                                                                                                                                                                                                                                                                                                                                                                                                                                                                                                                   |                |        |             |                             |                    |        |                           |        |               |                 |                     |        |                     |        |        |           |        |        |                |        |        |                       |        |        |                 |        |        |
| 4. Doctor                               | [ ][ ]                                                                                                                                                   | [ ][ ]                                                                                                                                                                                                                                                                                                                                                                                                                                                                                                                                                                                                                                                                                                                   |                |        |             |                             |                    |        |                           |        |               |                 |                     |        |                     |        |        |           |        |        |                |        |        |                       |        |        |                 |        |        |
| 88. Don't know                          | [ ][ ]                                                                                                                                                   | [ ][ ]                                                                                                                                                                                                                                                                                                                                                                                                                                                                                                                                                                                                                                                                                                                   |                |        |             |                             |                    |        |                           |        |               |                 |                     |        |                     |        |        |           |        |        |                |        |        |                       |        |        |                 |        |        |
| 99. Refuses to answer                   | [ ][ ]                                                                                                                                                   | [ ][ ]                                                                                                                                                                                                                                                                                                                                                                                                                                                                                                                                                                                                                                                                                                                   |                |        |             |                             |                    |        |                           |        |               |                 |                     |        |                     |        |        |           |        |        |                |        |        |                       |        |        |                 |        |        |
| Other (specify)                         | [ ][ ]                                                                                                                                                   | [ ][ ]                                                                                                                                                                                                                                                                                                                                                                                                                                                                                                                                                                                                                                                                                                                   |                |        |             |                             |                    |        |                           |        |               |                 |                     |        |                     |        |        |           |        |        |                |        |        |                       |        |        |                 |        |        |
| <b>Section D: Drug stock and supply</b> |                                                                                                                                                          |                                                                                                                                                                                                                                                                                                                                                                                                                                                                                                                                                                                                                                                                                                                          |                |        |             |                             |                    |        |                           |        |               |                 |                     |        |                     |        |        |           |        |        |                |        |        |                       |        |        |                 |        |        |
| D1                                      | Do you sell antimalarial drugs?<br>0 No<br>1 Yes<br>99. Refuses to answer                                                                                | [ ][ ]                                                                                                                                                                                                                                                                                                                                                                                                                                                                                                                                                                                                                                                                                                                   |                |        |             |                             |                    |        |                           |        |               |                 |                     |        |                     |        |        |           |        |        |                |        |        |                       |        |        |                 |        |        |
| D2                                      | If yes, which brands of antimalarials do you sell? <i>(Tick all that apply)</i>                                                                          | <table border="0"> <tbody> <tr> <td>1. Chloroquine</td> <td>[ ][ ]</td> </tr> <tr> <td>2. Fansidar</td> <td>[ ][ ]</td> </tr> <tr> <td>3. Coartem/lumatem</td> <td>[ ][ ]</td> </tr> <tr> <td>4. Camoquine</td> <td>[ ][ ]</td> </tr> <tr> <td>5. Quinine</td> <td>[ ][ ]</td> </tr> <tr> <td>6. Metakelfin</td> <td>[ ][ ]</td> </tr> <tr> <td>Other (specify)</td> <td>[ ][ ]</td> </tr> </tbody> </table><br>[ ]<br>[ ]<br>[ ]                                                                                                                                                                                                                                                                                        | 1. Chloroquine | [ ][ ] | 2. Fansidar | [ ][ ]                      | 3. Coartem/lumatem | [ ][ ] | 4. Camoquine              | [ ][ ] | 5. Quinine    | [ ][ ]          | 6. Metakelfin       | [ ][ ] | Other (specify)     | [ ][ ] |        |           |        |        |                |        |        |                       |        |        |                 |        |        |
| 1. Chloroquine                          | [ ][ ]                                                                                                                                                   |                                                                                                                                                                                                                                                                                                                                                                                                                                                                                                                                                                                                                                                                                                                          |                |        |             |                             |                    |        |                           |        |               |                 |                     |        |                     |        |        |           |        |        |                |        |        |                       |        |        |                 |        |        |
| 2. Fansidar                             | [ ][ ]                                                                                                                                                   |                                                                                                                                                                                                                                                                                                                                                                                                                                                                                                                                                                                                                                                                                                                          |                |        |             |                             |                    |        |                           |        |               |                 |                     |        |                     |        |        |           |        |        |                |        |        |                       |        |        |                 |        |        |
| 3. Coartem/lumatem                      | [ ][ ]                                                                                                                                                   |                                                                                                                                                                                                                                                                                                                                                                                                                                                                                                                                                                                                                                                                                                                          |                |        |             |                             |                    |        |                           |        |               |                 |                     |        |                     |        |        |           |        |        |                |        |        |                       |        |        |                 |        |        |
| 4. Camoquine                            | [ ][ ]                                                                                                                                                   |                                                                                                                                                                                                                                                                                                                                                                                                                                                                                                                                                                                                                                                                                                                          |                |        |             |                             |                    |        |                           |        |               |                 |                     |        |                     |        |        |           |        |        |                |        |        |                       |        |        |                 |        |        |
| 5. Quinine                              | [ ][ ]                                                                                                                                                   |                                                                                                                                                                                                                                                                                                                                                                                                                                                                                                                                                                                                                                                                                                                          |                |        |             |                             |                    |        |                           |        |               |                 |                     |        |                     |        |        |           |        |        |                |        |        |                       |        |        |                 |        |        |
| 6. Metakelfin                           | [ ][ ]                                                                                                                                                   |                                                                                                                                                                                                                                                                                                                                                                                                                                                                                                                                                                                                                                                                                                                          |                |        |             |                             |                    |        |                           |        |               |                 |                     |        |                     |        |        |           |        |        |                |        |        |                       |        |        |                 |        |        |
| Other (specify)                         | [ ][ ]                                                                                                                                                   |                                                                                                                                                                                                                                                                                                                                                                                                                                                                                                                                                                                                                                                                                                                          |                |        |             |                             |                    |        |                           |        |               |                 |                     |        |                     |        |        |           |        |        |                |        |        |                       |        |        |                 |        |        |
| D3                                      | Do you sell antibiotics?<br>0 No<br>1 Yes<br>99. Refuses to answer                                                                                       |                                                                                                                                                                                                                                                                                                                                                                                                                                                                                                                                                                                                                                                                                                                          |                |        |             |                             |                    |        |                           |        |               |                 |                     |        |                     |        |        |           |        |        |                |        |        |                       |        |        |                 |        |        |
| D4                                      | If yes, which brands of antibiotics do you sell? <i>(Tick all that apply)</i>                                                                            | <table border="0"> <tbody> <tr> <td>1. Amoxicillin</td> <td>[ ][ ]</td> </tr> <tr> <td>2. Septrin</td> <td>[ ][ ]</td> </tr> <tr> <td>3. Tetracycline</td> <td>[ ][ ]</td> </tr> <tr> <td>4. Gentamycin</td> <td>[ ][ ]</td> </tr> <tr> <td>5. Penicillin</td> <td>[ ][ ]</td> </tr> <tr> <td>77. Other (specify)</td> <td>[ ][ ]</td> </tr> </tbody> </table><br>[ ]                                                                                                                                                                                                                                                                                                                                                    | 1. Amoxicillin | [ ][ ] | 2. Septrin  | [ ][ ]                      | 3. Tetracycline    | [ ][ ] | 4. Gentamycin             | [ ][ ] | 5. Penicillin | [ ][ ]          | 77. Other (specify) | [ ][ ] |                     |        |        |           |        |        |                |        |        |                       |        |        |                 |        |        |
| 1. Amoxicillin                          | [ ][ ]                                                                                                                                                   |                                                                                                                                                                                                                                                                                                                                                                                                                                                                                                                                                                                                                                                                                                                          |                |        |             |                             |                    |        |                           |        |               |                 |                     |        |                     |        |        |           |        |        |                |        |        |                       |        |        |                 |        |        |
| 2. Septrin                              | [ ][ ]                                                                                                                                                   |                                                                                                                                                                                                                                                                                                                                                                                                                                                                                                                                                                                                                                                                                                                          |                |        |             |                             |                    |        |                           |        |               |                 |                     |        |                     |        |        |           |        |        |                |        |        |                       |        |        |                 |        |        |
| 3. Tetracycline                         | [ ][ ]                                                                                                                                                   |                                                                                                                                                                                                                                                                                                                                                                                                                                                                                                                                                                                                                                                                                                                          |                |        |             |                             |                    |        |                           |        |               |                 |                     |        |                     |        |        |           |        |        |                |        |        |                       |        |        |                 |        |        |
| 4. Gentamycin                           | [ ][ ]                                                                                                                                                   |                                                                                                                                                                                                                                                                                                                                                                                                                                                                                                                                                                                                                                                                                                                          |                |        |             |                             |                    |        |                           |        |               |                 |                     |        |                     |        |        |           |        |        |                |        |        |                       |        |        |                 |        |        |
| 5. Penicillin                           | [ ][ ]                                                                                                                                                   |                                                                                                                                                                                                                                                                                                                                                                                                                                                                                                                                                                                                                                                                                                                          |                |        |             |                             |                    |        |                           |        |               |                 |                     |        |                     |        |        |           |        |        |                |        |        |                       |        |        |                 |        |        |
| 77. Other (specify)                     | [ ][ ]                                                                                                                                                   |                                                                                                                                                                                                                                                                                                                                                                                                                                                                                                                                                                                                                                                                                                                          |                |        |             |                             |                    |        |                           |        |               |                 |                     |        |                     |        |        |           |        |        |                |        |        |                       |        |        |                 |        |        |

|     |                                                                                                                                         |                                                                                                                                       |
|-----|-----------------------------------------------------------------------------------------------------------------------------------------|---------------------------------------------------------------------------------------------------------------------------------------|
|     |                                                                                                                                         | [_____]<br>[_____]                                                                                                                    |
| D5  | Do you sell zinc tablets?<br>0 No<br>1 Yes<br>99.Refuses to answer                                                                      | [____]                                                                                                                                |
| D6  | Do you sell ORS?<br>0. No<br>1. Yes<br>99. Refuses to answer                                                                            | [____]                                                                                                                                |
| D7  | Do you have stock control cards? ( <i>Ask to see them</i> )<br>0 No<br>1 Yes<br>88 Don't know<br>99 Refuses to answer                   | [____]                                                                                                                                |
| D8  | Do you normally inject patients here in your shop/private clinic?<br>0 No go to D10<br>1 Yes go to D9<br>99 Refuses to answer go to D10 | [____]                                                                                                                                |
| D9  | In the last week, how many injections did you give?                                                                                     | [__ __] _injections<br>77. Other specify.....                                                                                         |
| D10 | Where do you usually purchase your drugs from? ( <i>Tick all that apply</i> )                                                           | 1. Pharmacies [____]<br>2. Health Units [____]<br>3. Open Markets [____]<br>77. Other (specify) [____]<br>[_____<br>[_____<br>[_____] |

| Section E: Malaria, Pneumonia and diarrhoea treatment services |                                                                                                                                                                        |                                          |
|----------------------------------------------------------------|------------------------------------------------------------------------------------------------------------------------------------------------------------------------|------------------------------------------|
| E1                                                             | Have you attended any training workshops on management of malaria?<br>0 No go to E5<br>1 Yes go to E2<br>88 Don't know go to E5<br>99 Refuses to answer go to E5       | [ ][ ]                                   |
| E2                                                             | When was your last training? (mm/yy)<br><i>(If don't know enter 88/88; if refuses to answer enter 99/99)</i>                                                           | [ ][ ][ ][ ] / [ ][ ]                    |
| E3                                                             | Did the training cover<br>1. Microscopy?<br>2. Rapid Diagnostic Tests (RDTs)<br>3. Artemisinin Combination Therapies CTs)<br>4. IMCI Guidelines?                       | 0 No 1. Yes.<br>[ ]<br>[ ]<br>[ ]<br>[ ] |
| E4                                                             | Who provided the training?<br>1 Ministry of Health<br>2 The district health team<br>77 Other (specify).....<br>88 Don't know<br>99 Refuses to answer                   | [ ]                                      |
| E5                                                             | Have you attended any training workshops on management of pneumonia?<br>0. No go to E9<br>1. Yes go to E6<br>88. Don't know go to E9<br>99. Refuses to answer go to E9 | [ ][ ]                                   |
| E6                                                             | When was the last training held? (mm/yy)                                                                                                                               | [ ][ ][ ][ ] / [ ][ ]                    |
| E7                                                             | Did the training cover<br>1. Antibiotics<br>2. IMCI Guidelines?                                                                                                        | 0 No 1. Yes.<br>[ ]<br>[ ]               |
| E8                                                             | Who provided the training?<br>1. Ministry of Health<br>2. The district health team<br>3. Other (specify).....<br>88. Don't know<br>99. Refuses to answer               | [ ]                                      |
| E9                                                             | Have you attended any training workshops on management of diarrhoea?<br>0.No                                                                                           | [ ][ ]                                   |

|     |                                                                                                                                                        |                                                      |
|-----|--------------------------------------------------------------------------------------------------------------------------------------------------------|------------------------------------------------------|
|     | 1.Yes<br>88. Don't know<br>99. Refuses to answer                                                                                                       |                                                      |
| E10 | Did the training cover<br>1. Microscopy?<br>2. Rapid Diagnostic Tests (RDTs)<br>3. Artemisinin Combination Therapies CTs)<br>4. IMCI Guidelines?       | 0 No 1. Yes.<br>[____]<br>[____]<br>[____]<br>[____] |
| E11 | Who provided the training?<br>3 Ministry of Health<br>4 The district health team<br>78 Other (specify).....<br>89 Don't know<br>100 Refuses to answer  | [____]                                               |
| E12 | Is there a thermometer available for use at this drug shop/private clinic? (ask to see it)<br>0 No<br>1 Yes<br>88 Don't know<br>99 Refuses to answer   | [____ ____]                                          |
| E13 | Is there a functioning microscope at this drug shop/private clinic? ( <i>Ask to see it</i> )<br>0 No<br>1 Yes<br>88 Don't know<br>99 Refuses to answer | [____ ____]                                          |
| E14 | Do you have a malaria rapid diagnostic test (RDT) at this drug shop/private clinic?<br>0 No<br>1 Yes<br>88 Don't know<br>99 Refuses to answer          | [____ ____]                                          |
| E15 | What is the first-line treatment of uncomplicated malaria as recommended by the treatment guideline?                                                   | Specify the drug/s:<br>[_____]                       |
| E15 | What is the first-line treatment of pneumonia as recommended by the guideline?                                                                         | [____]<br>Specify the drug/s:<br>[_____]             |
| E16 | What is the first-line treatment of diarrhea as recommended by the treatment guideline?                                                                | Specify the drug/s:<br>[_____]                       |
| E17 | Do you have a copy of the malaria treatment guidelines? ( <i>Ask to see it</i> )<br>0 No<br>1 Yes<br>88 Don't know<br>99 Refuses to answer             | [____]                                               |



|      |                                                                                                                                                                                             |                                                                                                                                                                                                                           |
|------|---------------------------------------------------------------------------------------------------------------------------------------------------------------------------------------------|---------------------------------------------------------------------------------------------------------------------------------------------------------------------------------------------------------------------------|
| E18  | Do you have a copy of IMCI guidelines?<br>(Ask to see it)<br>0 No<br>1 Yes<br>88 Don't know<br>99 Refuses to answer                                                                         | [ ]                                                                                                                                                                                                                       |
| E 19 | What treatment do you give to a child who presents uncomplicated malaria?                                                                                                                   | [ ]                                                                                                                                                                                                                       |
| E 20 | In the last one week, how many children with severe illness did you see?                                                                                                                    | [ ] [ ]                                                                                                                                                                                                                   |
| E21  | In the last <b>two</b> weeks have you referred any sick children?<br>0 No<br>1 Yes<br>88 Don't know<br>99 Refuses to answer                                                                 | [ ]                                                                                                                                                                                                                       |
| E22  | If yes how many sick children have you referred (verify the numbers by checking the records)                                                                                                | [ ] [ ]<br>Other specify.....                                                                                                                                                                                             |
| E23  | Where did you refer the sick children?<br>1. Another drug shop<br>2. Another private clinic<br>3. Health centre (II, III, IV)<br>4. Hospital<br>77. Other (specify)<br>99 Refuses to answer | [ ]<br>If other:<br>[ ]                                                                                                                                                                                                   |
| E24  | What are severe symptoms/signs of a child with severe malaria? (list as many)                                                                                                               | .....<br>.....<br>.....<br>.....                                                                                                                                                                                          |
| E25  | What are severe symptoms/signs of a child with severe pneumonia?                                                                                                                            | .....<br>.....<br>.....<br>.....                                                                                                                                                                                          |
| E26  | What are severe symptoms/signs of a child with severe diarrhoea?                                                                                                                            | .....<br>.....<br>.....<br>.....                                                                                                                                                                                          |
| E27  | What constraints do you encounter in referring patients? (Tick all that apply)                                                                                                              | 1. I don't have any constraints [ ]<br>2. Patients do not comply [ ]<br>3. Patients do not have the money [ ]<br>4. Referral facilities are too far [ ]<br>5. No drugs at the referral facility [ ]<br>77 Other (specify) |

|     |                                                                                   |                                                                                                                                                                                  |
|-----|-----------------------------------------------------------------------------------|----------------------------------------------------------------------------------------------------------------------------------------------------------------------------------|
|     |                                                                                   | <input type="text"/><br>Refuses to answer <input type="checkbox"/>                                                                                                               |
| E28 | When did this drug shop/private clinic last receive supervision from the DDI/DHT? | <input type="text"/> <input type="text"/> <input type="text"/> <input type="text"/> <input type="text"/> <input type="text"/><br>months<br>77. If other:<br><input type="text"/> |

| <b>Section F: Observations</b> |                                                                                     |        |
|--------------------------------|-------------------------------------------------------------------------------------|--------|
| F1                             | Does the shop/private clinic have a laboratory?<br>0 No<br>1 Yes                    | [____] |
| F2                             | Does the shop/private clinic have disposable syringes and needles?<br>0 No<br>1 Yes | [____] |
| F3                             | Does the shop/private clinic have a baby weighing scale?<br>0 No<br>1 Yes           | [____] |
| F4                             | Does the shop/private clinic have a respiratory timer?<br>0. No<br>1. Yes           | [____] |
| F5                             | Does the shop/private clinic have a bin for disposal of “sharps”?<br>0 No<br>1 Yes  | [____] |

**Section G: Addendum-Malaria in pregnancy**

|    |                                                                                                                                                                                                                                                                                                                                                                     |                                        |
|----|---------------------------------------------------------------------------------------------------------------------------------------------------------------------------------------------------------------------------------------------------------------------------------------------------------------------------------------------------------------------|----------------------------------------|
| G1 | <p>Which people are most vulnerable to malaria in this community?</p> <ol style="list-style-type: none"> <li>2. All people</li> <li>3. Children (0-5)</li> <li>4. Children (6-15)</li> <li>5. Adults</li> <li>6. Pregnant women</li> <li>7. Other specify.....</li> </ol>                                                                                           | [___]                                  |
| G2 | <p>What treatment do you give to pregnant women who present with fever to this facility?</p> <ol style="list-style-type: none"> <li>1. Depends on gestation, if it is first trimester I give quinine, if second and third trimester i give ACT</li> <li>2. ACT</li> <li>3. SP</li> <li>4. Quinine</li> <li>5. Paracetamol</li> <li>6. Other specify.....</li> </ol> | [___]                                  |
| G3 | <p>What drug do you give to pregnant women for preventing malaria?</p> <ol style="list-style-type: none"> <li>1. Quinine</li> <li>2. ACT</li> <li>3. SP</li> <li>4. Other specify.....</li> </ol>                                                                                                                                                                   | [___]                                  |
| G4 | <p>What other malaria prevention interventions in pregnancy do you recommend</p> <ol style="list-style-type: none"> <li>1. ITNs</li> <li>2. IRS</li> <li>3. Advice on nutrition</li> <li>4. Other specify.....</li> </ol>                                                                                                                                           | [___]                                  |
| G5 | <p>What interventions do you suggest that can attract women to come for malaria prevention in pregnancy with SP at ANC?</p>                                                                                                                                                                                                                                         | <p>.....</p> <p>.....</p> <p>.....</p> |

**Section H: Addendum-Family planning in drug shops/pharmacies**

|    |                                                                                                                                                                                                                |                                 |
|----|----------------------------------------------------------------------------------------------------------------------------------------------------------------------------------------------------------------|---------------------------------|
| H1 | Type of facility<br>1. drug shop<br>2. pharmacy                                                                                                                                                                | [ ]                             |
| H2 | Do you offer family planning methods in your shop<br>0.No<br>1. Yes                                                                                                                                            | [ ]                             |
| H3 | If yes which methods (tick all applicable and verify)<br>1.pills<br>2. Condoms<br>3.Injectable Depo-Provera<br>4. IUD (coil)<br>5. Other specify.....                                                          | [ ]<br>[ ]<br>[ ]<br>[ ]<br>[ ] |
| H4 | How much do you sell a cycle of contraceptive pills                                                                                                                                                            | .....                           |
| H5 | How much do you sell a packet of condoms                                                                                                                                                                       | .....                           |
| H6 | In a week how many clients come to ask for family planning?                                                                                                                                                    | .....                           |
| H7 | If No would you like to offer family planning methods<br>0.No<br>1. Yes                                                                                                                                        | [ ]                             |
| H8 | What are the reasons that you are not currently offering family planning methods?                                                                                                                              | .....<br>.....<br>.....         |
| H9 | What do you recommend to government to do so that drug shops and pharmacies can offer family planning<br>1.training<br>2. provide family planning methods<br>3. Supervision<br>4.seminars<br>5.other (specify) | [ ]<br>.....<br>.....<br>.....  |
